# Supplementary material for: Clinical Features in Aromatic L-Amino Acid Decarboxylase (AADC) Deficiency: A Systematic Review
Source: Hindawi journal article supplement (doi:10.1155/2022/2210555), 2022-10-11
Supplement: f1 [file 2210555.f1.zip]

[illegible]









[illegible]
