# Supplementary material for: Clinical Features in Aromatic L-Amino Acid Decarboxylase (AADC) Deficiency: A Systematic Review
Source: Behav Neurol. 2022 Oct 11;2022:2210555. doi: 10.1155/2022/2210555 (PMC9578880; doi:10.1155/2022/2210555)
Supplement: Supplementary Materials — contain a database with the whole list of reviewed studies, with the clinical, laboratory, and genetic data extracted from each paper and flow diagram summarizing the identification process of the included studies in this systematic review. [file 2210555.f1.zip]

Archive with 2 entries (2 files):
- Flow diagram materals 1 (1).docx
- Suppl table 1AAD.pdf
